# Supplementary material for: An efficient heterodinuclear Ir(iii)/Pt(ii) complex: synthesis, photophysics and application in light-emitting electrochemical cells
Source: Royal Society of Chemistry journal article supplement (doi:10.1039/c9tc02930c), 2019-01-01
Supplement: c9tc02930c1.pdf [file c9tc02930c1.pdf]

*Supporting Information*

**An Efficient Heterodinuclear Ir(III)/Pt(II) Complex: Synthesis, Photophysics and Application in Light-Emitting Electrochemical Cells**

Marsel Z. Shafikov,<sup>a,b,\*</sup> Shi Tang,<sup>c</sup> Christian Larsen,<sup>c</sup> Michael Bodensteiner,<sup>d</sup> Valery N. Kozhevnikov<sup>e,\*</sup> and Ludvig Edman<sup>c,\*</sup>

<sup>a</sup> *Institut für Physikalische und Theoretische Chemie and <sup>d</sup>Zentrale Analytik Universität Regensburg, Universitätsstrasse 31, Regensburg, D-93053, Germany.*

<sup>b</sup> *Ural Federal University, Mira 19, Ekaterinburg, 620002, Russia. E-mail: shafikoff@gmail.com*

<sup>c</sup> *The Organic Photonics and Electronics Group, Department of Physics, Umeå University, SE-90187 Umeå, Sweden. E-mail: ludvig.edman@umu.se*

<sup>e</sup> *Department of Applied Sciences, Northumbria University, Newcastle-Upon-Tyne, NE1 8ST, UK. E-mail: valery.kozhevnikov@northumbria.ac.uk*

**Table S1.** Crystallographic data for complex **2**.

|                              |                                                                    |
|------------------------------|--------------------------------------------------------------------|
| Formula                      | C <sub>58</sub> H <sub>67</sub> IrN <sub>4</sub> O <sub>4</sub> Pt |
| $D_{calc.}/g\text{ cm}^{-3}$ | 1.452                                                              |
| $\mu/\text{mm}^{-1}$         | 9.146                                                              |
| Formula Weight               | 1271.44                                                            |
| Colour                       | clear red                                                          |
| Shape                        | needle                                                             |
| Size/ $\text{mm}^3$          | 0.34×0.09×0.05                                                     |
| $T/\text{K}$                 | 123.01(10)                                                         |
| Crystal System               | orthorhombic                                                       |
| Flack Parameter              | 0.003(8)                                                           |
| Hooft Parameter              | 0.001(3)                                                           |
| Space Group                  | $Pca2_1$                                                           |
| $a/\text{Å}$                 | 17.6736(2)                                                         |
| $b/\text{Å}$                 | 20.2100(2)                                                         |
| $c/\text{Å}$                 | 16.28070(10)                                                       |
| $\alpha/^\circ$              | 90                                                                 |
| $\beta/^\circ$               | 90                                                                 |
| $\gamma/^\circ$              | 90                                                                 |
| $V/\text{Å}^3$               | 5815.20(9)                                                         |
| $Z$                          | 4                                                                  |
| $Z'$                         | 1                                                                  |
| Wavelength/ $\text{Å}$       | 1.54184                                                            |
| Radiation type               | CuK $_{\alpha}$                                                    |
| $\theta_{min}/^\circ$        | 3.322                                                              |
| $\theta_{max}/^\circ$        | 76.635                                                             |
| Measured Refl.               | 69489                                                              |
| Independent Refl.            | 11699                                                              |
| Reflections with $I > 2(I)$  | 11482                                                              |
| $R_{int}$                    | 0.0387                                                             |
| Parameters                   | 685                                                                |
| Restraints                   | 109                                                                |
| Largest Peak                 | 1.244                                                              |
| Deepest Hole                 | -0.681                                                             |
| Goof                         | 1.021                                                              |
| $wR_2$ (all data)            | 0.0707                                                             |
| $wR_2$                       | 0.0700                                                             |
| $R_1$ (all data)             | 0.0276                                                             |
| $R_1$                        | 0.0270                                                             |

**Table S2.** The bond lengths and bond angles derived from XRD measurements on complex **2** and from DFT calculations on complex **2'** in the  $S_0$  ground state and in the  $T_1$  emissive state. The atom numbering is presented in Figure 1(a).

| Bond            | XRD (esd) | DFT: $S_0$ | DFT: $T_1$ |
|-----------------|-----------|------------|------------|
| Bond length (Å) |           |            |            |
| <b>Pt-C1</b>    | 1.966(6)  | 1.978      | 1.982      |
| <b>Pt-N1</b>    | 1.996(4)  | 2.030      | 2.017      |
| <b>Pt-O1</b>    | 2.010(4)  | 2.035      | 2.049      |
| <b>Pt-O2</b>    | 2.094(5)  | 2.150      | 2.177      |
| <b>Ir-C7</b>    | 1.997(6)  | 1.994      | 1.970      |
| <b>Ir-C8</b>    | 1.995(5)  | 1.997      | 1.991      |
| <b>Ir-N2</b>    | 2.042(5)  | 2.068      | 2.056      |

|                          |            |         |         |
|--------------------------|------------|---------|---------|
| <b>Ir-N3</b>             | 2.038(5)   | 2.055   | 2.071   |
| <b>Ir-O3</b>             | 2.145(4)   | 2.190   | 2.179   |
| <b>Ir-O4</b>             | 2.158(4)   | 2.186   | 2.171   |
| <i>Bond angle (°)</i>    |            |         |         |
| <b>C1-Pt-N1</b>          | 81.0(2)    | 80.854  | 81.129  |
| <b>C1-Pt-O1</b>          | 93.4(3)    | 93.639  | 94.003  |
| <b>C1-Pt-O2</b>          | 175.0(2)   | 175.896 | 175.891 |
| <b>N1-Pt-O1</b>          | 173.3(2)   | 174.492 | 175.095 |
| <b>O1-Pt-O2</b>          | 91.6(2)    | 90.449  | 89.661  |
| <b>C7-Ir-N2</b>          | 80.2(2)    | 80.379  | 82.193  |
| <b>C7-Ir-N3</b>          | 94.7(2)    | 97.657  | 96.973  |
| <b>C7-Ir-O4</b>          | 175.1(2)   | 175.945 | 172.460 |
| <b>C7-Ir-O3</b>          | 87.9(2)    | 91.969  | 91.064  |
| <b>C7-Ir-C8</b>          | 92.2(2)    | 89.939  | 94.612  |
| <b>N2-Ir-C8</b>          | 93.8(2)    | 98.366  | 98.130  |
| <b>N2-Ir-N3</b>          | 172.11(18) | 177.618 | 178.400 |
| <b>N2-Ir-O3</b>          | 89.14(16)  | 85.399  | 86.636  |
| <b>N2-Ir-O4</b>          | 96.42(16)  | 95.795  | 92.544  |
| <b>C8-Ir-N3</b>          | 80.3(2)    | 80.238  | 80.560  |
| <b>C8-Ir-O3</b>          | 177.0(2)   | 176.021 | 173.028 |
| <b>C8-Ir-O4</b>          | 91.64(19)  | 91.960  | 91.465  |
| <b>O3-Ir-O4</b>          | 88.44(16)  | 86.358  | 83.209  |
| <i>Torsion angle (°)</i> |            |         |         |
| <b>O1-Pt-C1-C2</b>       | 172.8(4)   | 179.802 | 177.202 |
| <b>O2-Pt-N1-C3</b>       | 176.9(4)   | 179.472 | 175.204 |
| <b>C6-C7-Ir-C8</b>       | 98.9(5)    | 101.788 | 103.586 |
| <b>C5-N2-Ir-N3</b>       | 52.3(15)   | 38.466  | 65.518  |
| <b>C6-C7-Ir-O3</b>       | 84.0(4)    | 81.704  | 80.465  |
| <b>C5-N2-Ir-O4</b>       | 173.7(4)   | 174.704 | 167.711 |
| <b>N2-Ir-O3-C14</b>      | 102.6(5)   | 94.023  | 72.811  |
| <b>N2-Ir-O4-C15</b>      | 99.5(5)    | 86.713  | 63.604  |

**Table S3.** DFT optimized geometries of complex **2'** in cartesian (XYZ) coordinates.

| Ground state ( $S_0$ ) |              |              |              | Lowest triplet state ( $T_1$ ) |              |              |              |
|------------------------|--------------|--------------|--------------|--------------------------------|--------------|--------------|--------------|
| C                      | 4.040186000  | -0.075141000 | 0.990373000  | C                              | 4.028891000  | -0.437140000 | 0.891470000  |
| N                      | 3.446032000  | -0.004150000 | -0.234372000 | N                              | 3.504849000  | 0.055580000  | -0.263149000 |
| C                      | 5.391473000  | -0.414527000 | 1.059052000  | C                              | 5.371491000  | -0.802771000 | 0.918600000  |
| C                      | 6.086918000  | -0.669441000 | -0.124355000 | C                              | 6.135496000  | -0.648432000 | -0.243227000 |
| N                      | 5.456471000  | -0.586391000 | -1.314102000 | N                              | 5.574134000  | -0.146396000 | -1.361297000 |
| C                      | 4.184861000  | -0.263698000 | -1.319389000 | C                              | 4.303589000  | 0.178495000  | -1.328953000 |
| C                      | 7.516285000  | -1.035837000 | -0.147626000 | C                              | 7.562675000  | -1.008943000 | -0.311190000 |
| C                      | 8.288035000  | -1.124124000 | 1.020072000  | C                              | 8.236664000  | -1.607095000 | 0.763877000  |
| C                      | 9.630647000  | -1.474579000 | 0.961206000  | C                              | 9.581996000  | -1.935427000 | 0.665157000  |
| C                      | 10.256422000 | -1.748652000 | -0.261151000 | C                              | 10.307787000 | -1.678008000 | -0.504709000 |
| C                      | 9.482563000  | -1.663882000 | -1.424969000 | C                              | 9.630698000  | -1.086318000 | -1.578356000 |
| C                      | 8.140552000  | -1.312894000 | -1.372679000 | C                              | 8.285628000  | -0.757510000 | -1.486886000 |
| C                      | 3.157690000  | 0.236854000  | 2.097473000  | C                              | 3.082034000  | -0.503310000 | 1.994014000  |
| C                      | 1.823128000  | 0.556967000  | 1.733658000  | C                              | 1.768715000  | -0.044878000 | 1.706432000  |
| C                      | 0.936907000  | 0.898858000  | 2.764553000  | C                              | 0.813220000  | -0.065985000 | 2.729315000  |
| C                      | 1.328089000  | 0.912574000  | 4.105790000  | C                              | 1.125030000  | -0.526498000 | 4.011432000  |
| C                      | 2.655354000  | 0.578213000  | 4.434653000  | C                              | 2.430748000  | -0.983498000 | 4.266292000  |
| C                      | 3.560734000  | 0.246576000  | 3.442481000  | C                              | 3.400009000  | -0.971027000 | 3.274270000  |
| C                      | 0.364443000  | 1.275865000  | 5.191367000  | C                              | 0.105130000  | -0.526863000 | 5.104858000  |
| C                      | 11.709925000 | -2.095895000 | -0.323322000 | C                              | 11.764286000 | -2.003441000 | -0.595686000 |
| H                      | 5.877902000  | -0.477432000 | 2.033389000  | H                              | 5.804023000  | -1.193936000 | 1.840241000  |
| H                      | 3.658274000  | -0.187099000 | -2.280137000 | H                              | 3.831407000  | 0.590680000  | -2.230690000 |
| H                      | 7.844350000  | -0.919098000 | 1.997972000  | H                              | 7.711389000  | -1.834465000 | 1.695232000  |
| H                      | 10.211698000 | -1.540285000 | 1.887212000  | H                              | 10.085278000 | -2.408100000 | 1.515089000  |
| H                      | 9.946996000  | -1.881528000 | -2.392871000 | H                              | 10.174638000 | -0.883217000 | -2.507006000 |
| H                      | 7.543485000  | -1.249670000 | -2.285349000 | H                              | 7.764779000  | -0.298435000 | -2.330293000 |
| H                      | -0.100399000 | 1.165945000  | 2.524703000  | H                              | -0.204068000 | 0.291233000  | 2.531227000  |
| H                      | 2.967667000  | 0.586450000  | 5.484401000  | H                              | 2.680995000  | -1.354292000 | 5.265777000  |
| H                      | 4.590977000  | -0.006182000 | 3.715076000  | H                              | 4.408174000  | -1.331529000 | 3.501722000  |
| H                      | 0.248640000  | 0.449611000  | 5.912889000  | H                              | 0.094374000  | -1.489048000 | 5.641622000  |
| H                      | 0.723009000  | 2.145476000  | 5.767420000  | H                              | 0.331886000  | 0.250339000  | 5.854545000  |
| H                      | -0.631098000 | 1.519355000  | 4.792292000  | H                              | -0.906565000 | -0.333698000 | 4.720063000  |
| H                      | 11.934106000 | -2.751778000 | -1.178337000 | H                              | 12.064971000 | -2.233767000 | -1.628994000 |
| H                      | 12.327509000 | -1.188765000 | -0.443572000 | H                              | 12.379368000 | -1.148595000 | -0.264670000 |
| H                      | 12.048699000 | -2.595430000 | 0.597062000  | H                              | 12.031093000 | -2.858107000 | 0.044270000  |
| Ir                     | 1.437245000  | 0.430514000  | -0.222044000 | Ir                             | 1.483071000  | 0.500249000  | -0.187471000 |
| C                      | -0.826528000 | 2.275801000  | -0.341444000 | C                              | -0.767435000 | 2.342301000  | 0.049416000  |
| N                      | -0.566091000 | 0.940362000  | -0.167035000 | N                              | -0.516740000 | 0.961337000  | -0.058890000 |
| C                      | -2.153066000 | 2.700208000  | -0.393902000 | C                              | -2.099141000 | 2.767633000  | 0.034181000  |
| C                      | -3.176808000 | 1.768650000  | -0.274426000 | C                              | -3.130249000 | 1.848592000  | -0.049296000 |
| N                      | -2.852400000 | 0.445274000  | -0.098202000 | N                              | -2.804741000 | 0.475918000  | -0.073619000 |
| C                      | -1.574549000 | 0.087466000  | -0.052897000 | C                              | -1.531491000 | 0.117669000  | -0.085472000 |
| C                      | -4.600335000 | 2.021220000  | -0.318961000 | C                              | -4.549927000 | 2.092170000  | -0.099862000 |
| C                      | -5.178505000 | 3.289643000  | -0.488170000 | C                              | -5.148839000 | 3.363316000  | -0.111925000 |
| C                      | -6.555882000 | 3.419448000  | -0.520950000 | C                              | -6.529354000 | 3.484424000  | -0.161366000 |
| C                      | -7.387310000 | 2.291003000  | -0.386639000 | C                              | -7.353243000 | 2.346529000  | -0.202767000 |
| C                      | -6.803426000 | 1.032434000  | -0.217512000 | C                              | -6.751859000 | 1.081495000  | -0.184969000 |
| C                      | -5.415442000 | 0.869710000  | -0.180415000 | C                              | -5.365294000 | 0.927055000  | -0.135366000 |
| C                      | 0.353217000  | 3.103043000  | -0.447430000 | C                              | 0.417073000  | 3.135340000  | 0.190498000  |
| C                      | 1.593243000  | 2.411963000  | -0.378769000 | C                              | 1.675424000  | 2.428013000  | 0.171805000  |
| C                      | 2.763732000  | 3.181813000  | -0.451008000 | C                              | 2.868767000  | 3.145498000  | 0.353473000  |
| C                      | 2.732005000  | 4.569636000  | -0.601549000 | C                              | 2.880892000  | 4.527172000  | 0.534125000  |
| C                      | 1.486066000  | 5.223430000  | -0.677495000 | C                              | 1.636735000  | 5.199156000  | 0.535566000  |
| C                      | 0.311242000  | 4.500279000  | -0.599397000 | C                              | 0.433578000  | 4.529958000  | 0.374367000  |
| C                      | 3.992999000  | 5.370044000  | -0.684615000 | C                              | 4.150903000  | 5.295284000  | 0.719282000  |
| C                      | -8.873708000 | 2.456550000  | -0.429816000 | C                              | -8.841627000 | 2.490139000  | -0.290383000 |

|    |              |              |              |    |              |              |              |
|----|--------------|--------------|--------------|----|--------------|--------------|--------------|
| H  | -2.387766000 | 3.756396000  | -0.535828000 | H  | -2.331476000 | 3.834568000  | 0.091875000  |
| H  | -1.346345000 | -0.976273000 | 0.089837000  | H  | -1.314460000 | -0.958847000 | -0.099642000 |
| H  | -4.548386000 | 4.179017000  | -0.594195000 | H  | -4.527812000 | 4.265752000  | -0.080861000 |
| H  | -7.010092000 | 4.407359000  | -0.652210000 | H  | -6.988412000 | 4.479494000  | -0.167477000 |
| H  | -7.445030000 | 0.150106000  | -0.110614000 | H  | -7.385575000 | 0.186550000  | -0.205425000 |
| H  | 3.743068000  | 2.690032000  | -0.389495000 | H  | 3.827157000  | 2.611161000  | 0.353829000  |
| H  | 1.456229000  | 6.311825000  | -0.795069000 | H  | 1.627277000  | 6.286401000  | 0.675398000  |
| H  | -0.648959000 | 5.023897000  | -0.654764000 | H  | -0.503987000 | 5.094040000  | 0.399003000  |
| H  | 4.063690000  | 5.898941000  | -1.650170000 | H  | 4.293271000  | 6.042494000  | -0.080543000 |
| H  | 4.024315000  | 6.145696000  | 0.098796000  | H  | 4.152200000  | 5.853189000  | 1.671454000  |
| H  | 4.887706000  | 4.739585000  | -0.577235000 | H  | 5.029149000  | 4.632609000  | 0.717330000  |
| H  | -9.396778000 | 1.502065000  | -0.272866000 | H  | -9.358601000 | 1.590878000  | 0.078587000  |
| H  | -9.218068000 | 3.166680000  | 0.340517000  | H  | -9.202243000 | 3.356428000  | 0.287431000  |
| H  | -9.199365000 | 2.866803000  | -1.400713000 | H  | -9.170008000 | 2.645873000  | -1.333602000 |
| Pt | -4.427171000 | -0.826836000 | 0.055576000  | Pt | -4.376004000 | -0.789045000 | -0.071962000 |
| O  | 1.119131000  | -1.728169000 | -0.096065000 | O  | 1.071984000  | -1.548861000 | -0.773616000 |
| O  | 1.139833000  | 0.207473000  | -2.380670000 | O  | 1.300675000  | 0.875604000  | -2.325830000 |
| C  | 0.861720000  | -0.866465000 | -2.988949000 | C  | 0.725858000  | 0.148681000  | -3.190691000 |
| C  | 0.911026000  | -2.510921000 | -1.067915000 | C  | 0.486287000  | -1.939751000 | -1.829859000 |
| C  | 0.756167000  | -2.152316000 | -2.422012000 | C  | 0.286471000  | -1.171822000 | -2.990290000 |
| O  | -3.222778000 | -2.588826000 | 0.316509000  | O  | -3.172239000 | -2.597859000 | 0.067338000  |
| C  | -3.704404000 | -3.743946000 | 0.495260000  | C  | -3.666483000 | -3.747258000 | 0.248458000  |
| C  | -5.075278000 | -4.074873000 | 0.532041000  | C  | -5.039664000 | -4.067106000 | 0.282913000  |
| C  | -6.163374000 | -3.206417000 | 0.377306000  | C  | -6.123648000 | -3.192889000 | 0.112479000  |
| O  | -6.121645000 | -1.946574000 | 0.184237000  | O  | -6.075301000 | -1.933149000 | -0.054384000 |
| C  | -2.701567000 | -4.844967000 | 0.672449000  | C  | -2.683257000 | -4.872931000 | 0.407707000  |
| C  | -7.553557000 | -3.763029000 | 0.437046000  | C  | -7.515004000 | -3.753151000 | 0.124902000  |
| C  | 0.835675000  | -3.965877000 | -0.703193000 | C  | -0.075992000 | -3.325285000 | -1.780592000 |
| C  | 0.644312000  | -0.719404000 | -4.468309000 | C  | 0.526333000  | 0.787551000  | -4.531600000 |
| H  | 0.541670000  | -2.969810000 | -3.115598000 | H  | -0.210323000 | -1.664412000 | -3.829859000 |
| H  | -5.318222000 | -5.127906000 | 0.694879000  | H  | -5.288796000 | -5.120176000 | 0.439317000  |
| H  | -2.001641000 | -4.573035000 | 1.478566000  | H  | -1.805870000 | -4.525142000 | 0.973412000  |
| H  | -2.104246000 | -4.939279000 | -0.249036000 | H  | -2.326271000 | -5.190300000 | -0.587272000 |
| H  | -3.160366000 | -5.815872000 | 0.900340000  | H  | -3.121174000 | -5.751179000 | 0.901835000  |
| H  | -7.574589000 | -4.847346000 | 0.605717000  | H  | -7.540804000 | -4.840038000 | 0.277048000  |
| H  | -8.078252000 | -3.531640000 | -0.503583000 | H  | -8.012027000 | -3.508986000 | -0.827537000 |
| H  | -8.112840000 | -3.259172000 | 1.241355000  | H  | -8.098752000 | -3.260481000 | 0.918714000  |
| H  | 0.186875000  | -4.086376000 | 0.177571000  | H  | -1.042978000 | -3.264747000 | -1.247153000 |
| H  | 1.839266000  | -4.310907000 | -0.403894000 | H  | 0.581638000  | -3.984056000 | -1.194654000 |
| H  | 0.475242000  | -4.602965000 | -1.522557000 | H  | -0.258187000 | -3.752193000 | -2.776198000 |
| H  | 1.538954000  | -0.264508000 | -4.923012000 | H  | 1.494610000  | 1.153086000  | -4.908333000 |
| H  | -0.185288000 | -0.015396000 | -4.641943000 | H  | -0.118631000 | 1.673177000  | -4.414061000 |
| H  | 0.423279000  | -1.668920000 | -4.973635000 | H  | 0.078308000  | 0.110399000  | -5.270498000 |

**Table S4.** Selected TD-DFT transitions of the model complex **2'** in the ground state ( $S_0$ ) geometry.

| State,<br>energy (eV)      | $f$<br>(oscillator<br>strength) | Contributing transition<br>coefficients*                                                           | Character**                                                                                                                     |
|----------------------------|---------------------------------|----------------------------------------------------------------------------------------------------|---------------------------------------------------------------------------------------------------------------------------------|
| <i>triplets</i>            |                                 |                                                                                                    |                                                                                                                                 |
| T <sub>1</sub> ,<br>1.868  | (triplet)                       | HOMO→LUMO (0.70)                                                                                   | M <sup>Ir(III)</sup> L <sup>dpp1</sup> CT/L <sup>dpp2</sup> L <sup>dpp1</sup> CT/LC <sup>dpp1</sup>                             |
| T <sub>2</sub> ,<br>2.016  | (triplet)                       | HOMO→LUMO+1 (0.70)                                                                                 | M <sup>Ir(III)</sup> L <sup>dpp2</sup> CT/L <sup>dpp1</sup> L <sup>dpp2</sup> CT/LC <sup>dpp2</sup>                             |
| T <sub>3</sub> ,<br>2.104  | (triplet)                       | HOMO-3→LUMO (0.16)<br>HOMO-1→LUMO (0.68)                                                           | M <sup>Ir(III)/Pt(II)</sup> L <sup>dpp1</sup> CT/L <sup>dpp2</sup> L <sup>dpp1</sup> CT/LC <sup>dpp2</sup>                      |
| <i>singlets</i>            |                                 |                                                                                                    |                                                                                                                                 |
| S <sub>1</sub> ,<br>1.992  | 0.0706                          | HOMO→LUMO (0.69)<br>HOMO-1→LUMO (0.10)                                                             | M <sup>Ir(III)/Pt(II)</sup> L <sup>dpp1</sup> CT/ L <sup>acac2</sup> L <sup>dpp1</sup> CT                                       |
| S <sub>2</sub> ,<br>2.125  | 0.0138                          | HOMO→LUMO+1 (0.69)                                                                                 | M <sup>Ir(III)</sup> L <sup>dpp2</sup> CT/L <sup>dpp1</sup> L <sup>dpp2</sup> CT/LC <sup>dpp2</sup>                             |
| S <sub>3</sub> ,<br>2.237  | 0.0624                          | HOMO-1→LUMO (0.10)<br>HOMO-2→LUMO (0.67)                                                           | M <sup>Ir(III)/Pt(II)</sup> L <sup>dpp1</sup> CT/ LC <sup>dpp1</sup> / L <sup>acac1</sup> L <sup>dpp1</sup> CT                  |
| S <sub>4</sub> ,<br>2.367  | 0.0349                          | HOMO-1→LUMO+1<br>(-0.10)<br>HOMO-2→LUMO+1<br>(0.68)                                                | M <sup>Ir(III)/Pt(II)</sup> L <sup>dpp2</sup> CT/L <sup>acac1</sup> L <sup>dpp1</sup> CT/L <sup>dpp1</sup> L <sup>dpp2</sup> CT |
| S <sub>5</sub> ,<br>2.444  | 0.1232                          | HOMO-3→LUMO<br>(-0.21)<br>HOMO-2→LUMO (0.64)<br>HOMO-1→LUMO<br>(-0.10)<br>HOMO-2→LUMO+1<br>(0.14)  | M <sup>Ir(III)/Pt(II)</sup> L <sup>dpp1</sup> CT/ LC <sup>dpp1</sup> / L <sup>acac1</sup> L <sup>dpp1</sup> CT                  |
| S <sub>6</sub> ,<br>2.496  | 0.0023                          | HOMO-2→LUMO<br>(-0.11)<br>HOMO-2→LUMO+1<br>(0.68)                                                  | M <sup>Pt(II)</sup> L <sup>dpp2</sup> CT/ L <sup>dpp1</sup> L <sup>dpp2</sup> CT/ L <sup>acac1</sup> L <sup>dpp2</sup> CT       |
| S <sub>7</sub> ,<br>2.535  | 0.0225                          | HOMO→LUMO+2 (0.69)                                                                                 | M <sup>Ir(III)</sup> L <sup>dpp1</sup> CT/L <sup>dpp2</sup> L <sup>dpp1</sup> CT/LC <sup>dpp1</sup>                             |
| S <sub>8</sub> ,<br>2.593  | 0.0070                          | HOMO-4→LUMO (0.69)<br>HOMO-3→LUMO (0.13)                                                           | M <sup>Pt(II)/Ir(III)</sup> L <sup>dpp1</sup> CT/LC <sup>dpp1</sup>                                                             |
| S <sub>9</sub> ,<br>2.620  | 0.1125                          | HOMO-4→LUMO<br>(-0.14)<br>HOMO-3→LUMO (0.63)<br>HOMO-3→LUMO+1<br>(0.13)<br>HOMO-2→LUMO (0.21)      | M <sup>Ir(III)/Pt(II)</sup> L <sup>dpp1</sup> CT/LC <sup>dpp1</sup>                                                             |
| S <sub>10</sub> ,<br>2.665 | 0.0233                          | HOMO-5→LUMO+1<br>(0.13)<br>HOMO-3→LUMO<br>(-0.12)<br>HOMO-3→LUMO+1<br>(0.60)<br>HOMO→LUMO+3 (0.32) | M <sup>Ir(III)/Pt(II)</sup> L <sup>dpp2</sup> CT                                                                                |

|                            |        |                                                                                                                                  |                                                                                                     |
|----------------------------|--------|----------------------------------------------------------------------------------------------------------------------------------|-----------------------------------------------------------------------------------------------------|
| S <sub>11</sub> ,<br>2.700 | 0.0748 | HOMO→5→LUMO (0.65)<br>HOMO→1→LUMO+2<br>(0.10)<br>HOMO→LUMO+3 (0.20)                                                              | M <sup>Ir(III)/Pt(II)</sup> L <sup>dpp1</sup> CT                                                    |
| S <sub>12</sub> ,<br>2.717 | 0.0070 | HOMO→5→LUMO<br>(-0.19)<br>HOMO→5→LUMO+1<br>(-0.19)<br>HOMO→3→LUMO+1<br>(-0.26)<br>HOMO→1→LUMO+2<br>(-0.12)<br>HOMO→LUMO+3 (0.57) | M <sup>Ir(III)</sup> L <sup>dpp2</sup> CT/L <sup>dpp1</sup> L <sup>dpp2</sup> CT/LC <sup>dpp2</sup> |
| S <sub>13</sub> ,<br>2.734 | 0.0001 | HOMO→4→LUMO+1<br>(0.70)                                                                                                          | M <sup>Pt(II)</sup> L <sup>dpp2</sup> CT                                                            |
| S <sub>14</sub> ,<br>2.785 | 0.0477 | HOMO→5→LUMO<br>(-0.12)<br>HOMO→5→LUMO+1<br>(-0.12)<br>HOMO→1→LUMO+2<br>(0.66)                                                    | M <sup>Ir(III)/Pt(II)</sup> L <sup>dpp1</sup> CT                                                    |

\*Square of the coefficient multiplied by two gives percentage contribution of the transition to formation of the excited state

\*\*MLCT – Metal-to-Ligand Charge Transfer; LLCT – Ligand-to-Ligand Charge transfer; LC – Ligand Centered.

**Table S5.** Selected TD-DFT transitions of the model complex **2'** in the lowest triplet state (T<sub>1</sub>) geometry.

| State,<br>energy (eV)     | <i>f</i><br>(oscillator<br>strength) | Contributing transition<br>coefficients*                                 | Character**                                                                                                |
|---------------------------|--------------------------------------|--------------------------------------------------------------------------|------------------------------------------------------------------------------------------------------------|
| <i>triplets</i>           |                                      |                                                                          |                                                                                                            |
| T <sub>1</sub> ,<br>1.615 | (triplet)                            | HOMO→LUMO (0.70)                                                         | M <sup>Ir(III)/Pt(II)</sup> L <sup>dpp1</sup> CT/L <sup>dpp2</sup> L <sup>dpp1</sup> CT/LC <sup>dpp1</sup> |
| T <sub>2</sub> ,<br>1.921 | (triplet)                            | HOMO→1→LUMO (0.68)<br>HOMO→3→LUMO (0.16)                                 | M <sup>Ir(III)/Pt(II)</sup> L <sup>dpp1</sup> CT                                                           |
| T <sub>3</sub> ,<br>1.931 | (triplet)                            | HOMO→LUMO+1 (0.70)                                                       | M <sup>Ir(III)</sup> L <sup>dpp2</sup> CT/L <sup>dpp1</sup> L <sup>dpp2</sup> CT/LC <sup>dpp2</sup>        |
| <i>singlets</i>           |                                      |                                                                          |                                                                                                            |
| S <sub>1</sub> ,<br>1.805 | 0.1058                               | HOMO→LUMO (0.69)<br>HOMO→1→LUMO (0.12)                                   | M <sup>Ir(III)/Pt(II)</sup> L <sup>dpp1</sup> CT                                                           |
| S <sub>2</sub> ,<br>2.028 | 0.0203                               | HOMO→LUMO+1 (0.70)                                                       | M <sup>Ir(III)</sup> L <sup>dpp2</sup> CT/L <sup>dpp1</sup> L <sup>dpp2</sup> CT/LC <sup>dpp2</sup>        |
| S <sub>3</sub> ,<br>2.088 | 0.0707                               | HOMO→LUMO (-0.11)<br>HOMO→1→LUMO (0.68)<br>HOMO→3→LUMO<br>(-0.10)        | M <sup>Ir(III)/Pt(II)</sup> L <sup>dpp1</sup> CT                                                           |
| S <sub>4</sub> ,<br>2.348 | 0.1126                               | HOMO→1→LUMO+1<br>(-0.17)<br>HOMO→2→LUMO (0.61)<br>HOMO→3→LUMO<br>(-0.30) | M <sup>Ir(III)/Pt(II)</sup> L <sup>dpp1</sup> CT/ M <sup>Ir(III)/Pt(II)</sup> L <sup>dpp2</sup> CT         |

|                            |        |                                                                                              |                                                                                                                                  |
|----------------------------|--------|----------------------------------------------------------------------------------------------|----------------------------------------------------------------------------------------------------------------------------------|
| S <sub>5</sub> ,<br>2.360  | 0.0362 | HOMO-1→LUMO+1<br>(0.66)<br>HOMO-2→LUMO<br>(-0.15)                                            | M <sup>Ir(III)/Pt(II)</sup> L <sup>dpp2</sup> CT/ M <sup>Ir(III)/Pt(II)</sup> L <sup>dpp1</sup> CT                               |
| S <sub>6</sub> ,<br>2.476  | 0.0497 | HOMO-4→LUMO (0.49)<br>HOMO-3→LUMO (0.41)<br>HOMO-2→LUMO (0.20)<br>HOMO→LUMO+2<br>(-0.20)     | M <sup>Ir(III)</sup> L <sup>dpp1</sup> CT/L <sup>acac1</sup> L <sup>dpp1</sup> CT                                                |
| S <sub>7</sub> ,<br>2.484  | 0.0469 | HOMO-4→LUMO (0.50)<br>HOMO-3→LUMO<br>(-0.40)<br>HOMO-2→LUMO<br>(-0.17)<br>HOMO→LUMO+2 (0.21) | M <sup>Ir(III)</sup> L <sup>dpp1</sup> CT/L <sup>acac1</sup> L <sup>dpp1</sup> CT                                                |
| S <sub>8</sub> ,<br>2.505  | 0.0319 | HOMO-3→LUMO (0.25)<br>HOMO-2→LUMO (0.13)<br>HOMO→LUMO+2 (0.63)                               | M <sup>Ir(III)</sup> L <sup>dpp1</sup> CT/L <sup>acac1</sup> L <sup>dpp1</sup> CT                                                |
| S <sub>9</sub> ,<br>2.532  | 0.0045 | HOMO-2→LUMO+1<br>(0.70)                                                                      | M <sup>Ir(III)/Pt(II)</sup> L <sup>dpp2</sup> CT/L <sup>dpp1</sup> L <sup>dpp2</sup> CT/ L <sup>acac1</sup> L <sup>dpp2</sup> CT |
| S <sub>10</sub> ,<br>2.575 | 0.0352 | HOMO-5→LUMO (0.659)                                                                          | M <sup>Ir(III)/Pt(II)</sup> L <sup>dpp1</sup> CT                                                                                 |

\*Square of the coefficient multiplied by two gives percentage contribution of the transition to formation of the excited state

\*\*MLCT – Metal-to-Ligand Charge Transfer; LLCT – Ligand-to-Ligand Charge transfer; LC – Ligand Centered.



**Table S6.** DFT calculated frontier orbital energy levels and involved contributions of complex **2'** resulting from Mulliken population analysis in the ground state ( $S_0$ ) relaxed geometry.

| Orbital | Energy, (eV) | Contributions, (%) |    |                   |                   |                    |                    |
|---------|--------------|--------------------|----|-------------------|-------------------|--------------------|--------------------|
|         |              | Pt                 | Ir | dpp1 <sup>a</sup> | dpp2 <sup>b</sup> | acac1 <sup>c</sup> | acac2 <sup>d</sup> |
| LUMO+4  | -1.71        | 3                  | 0  | 3                 | 0                 | 94                 | 0                  |
| LUMO+3  | -2.07        | 0                  | 1  | 4                 | 95                | 0                  | 0                  |
| LUMO+2  | -2.23        | 1                  | 1  | 92                | 4                 | 2                  | 0                  |
| LUMO+1  | -2.66        | 0                  | 5  | 1                 | 94                | 0                  | 1                  |
| LUMO    | -2.81        | 4                  | 4  | 89                | 1                 | 2                  | 0                  |
| HOMO    | -4.74        | 2                  | 47 | 22                | 21                | 1                  | 6                  |
| HOMO-1  | -4.99        | 4                  | 39 | 10                | 5                 | 1                  | 41                 |
| HOMO-2  | -5.14        | 33                 | 8  | 31                | 2                 | 21                 | 6                  |
| HOMO-3  | -5.29        | 31                 | 22 | 18                | 7                 | 18                 | 4                  |
| HOMO-4  | -5.39        | 91                 | 0  | 5                 | 0                 | 3                  | 0                  |

a) dpp1 – Pt(II)/Ir(III) two-coordinated diphenylpyrimidine  
b) dpp2 – Ir(III) mono-coordinated diphenylpyrimidine  
c) acac1 – Pt(II) coordinated acetylacetonate  
d) acac2 – Ir(III) coordinated acetylacetonate

**Table S7.** DFT calculated frontier orbital energy levels and involved contributions of complex **2'** resulting from Mulliken population analysis in the lowest triplet state ( $T_1$ ) geometry.

| Orbital | Energy, (eV) | Contributions, (%) |    |                   |                   |                    |                    |
|---------|--------------|--------------------|----|-------------------|-------------------|--------------------|--------------------|
|         |              | Pt                 | Ir | dpp1 <sup>a</sup> | dpp2 <sup>b</sup> | acac1 <sup>c</sup> | acac2 <sup>d</sup> |
| LUMO+4  | -1.70        | 3                  | 0  | 4                 | 0                 | 92                 | 2                  |
| LUMO+3  | -2.05        | 0                  | 1  | 11                | 87                | 1                  | 0                  |
| LUMO+2  | -2.17        | 1                  | 1  | 83                | 12                | 2                  | 1                  |
| LUMO+1  | -2.65        | 0                  | 4  | 1                 | 94                | 0                  | 1                  |
| LUMO    | -2.94        | 5                  | 5  | 89                | 1                 | 1                  | 1                  |
| HOMO    | -4.63        | 2                  | 42 | 25                | 20                | 1                  | 10                 |
| HOMO-1  | -4.96        | 3                  | 40 | 11                | 7                 | 0                  | 39                 |
| HOMO-2  | -5.18        | 35                 | 4  | 31                | 1                 | 26                 | 3                  |
| HOMO-3  | -5.30        | 33                 | 20 | 19                | 6                 | 15                 | 7                  |
| HOMO-4  | -5.41        | 91                 | 0  | 6                 | 0                 | 3                  | 0                  |

a) dpp1 – Pt(II)/Ir(III) two-coordinated diphenylpyrimidine  
b) dpp2 – Ir(III) mono-coordinated diphenylpyrimidine  
c) acac1 – Pt(II) coordinated acetylacetonate  
d) acac2 – Ir(III) coordinated acetylacetonate

**Table S8.** M06L/def2-SVP/C-PCM Iso-surface contour plots (iso-value = 0.05) of selected orbitals of model complex **2'** at the relaxed ground state ( $S_0$ ) geometry (M06/def2-SVP/C-PCM).

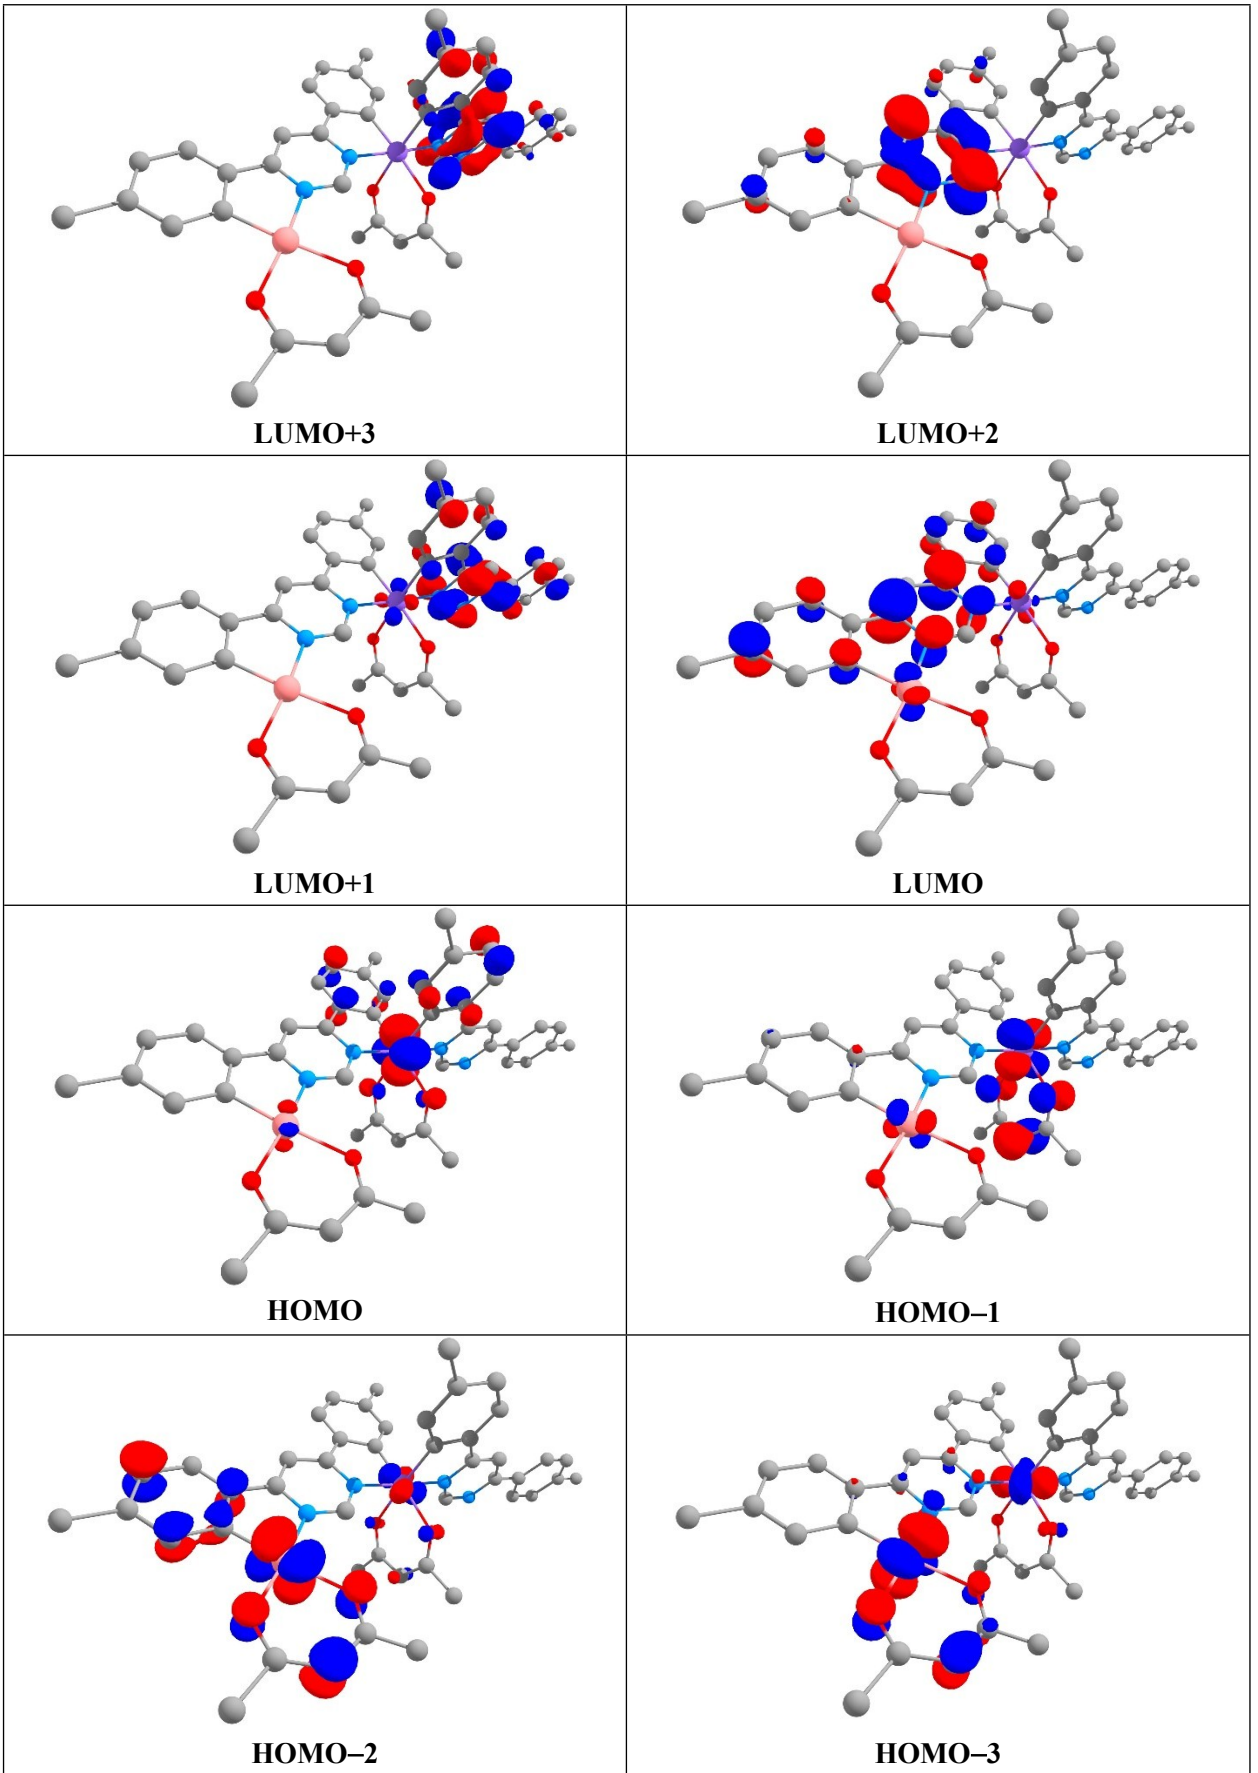

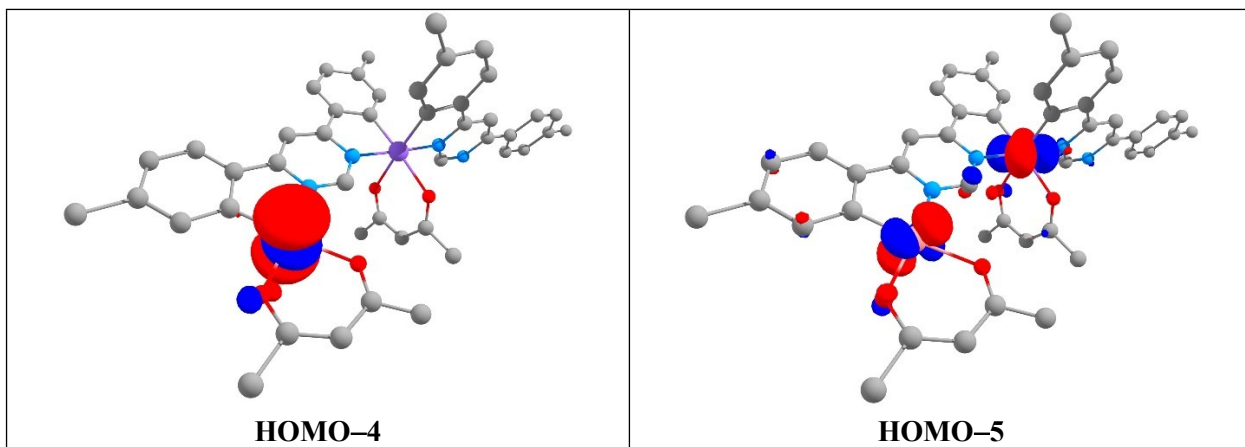

**Table S9.** Iso-surface contour plots (iso-value = 0.05) of selected orbitals of model complex **2'** at the relaxed  $T_1$  state geometry.

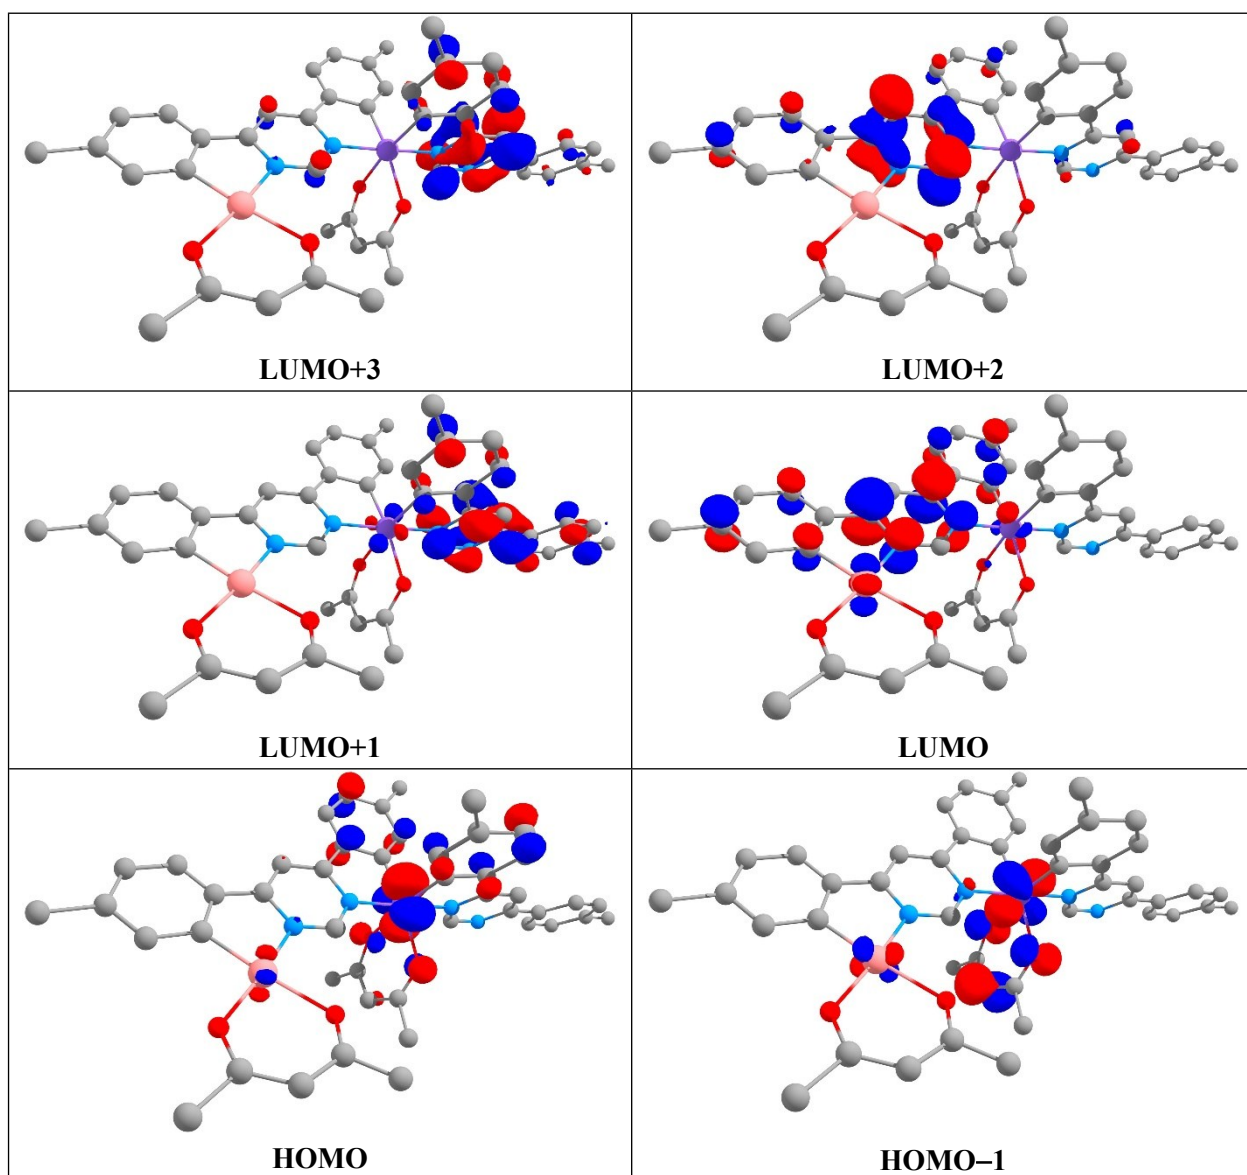

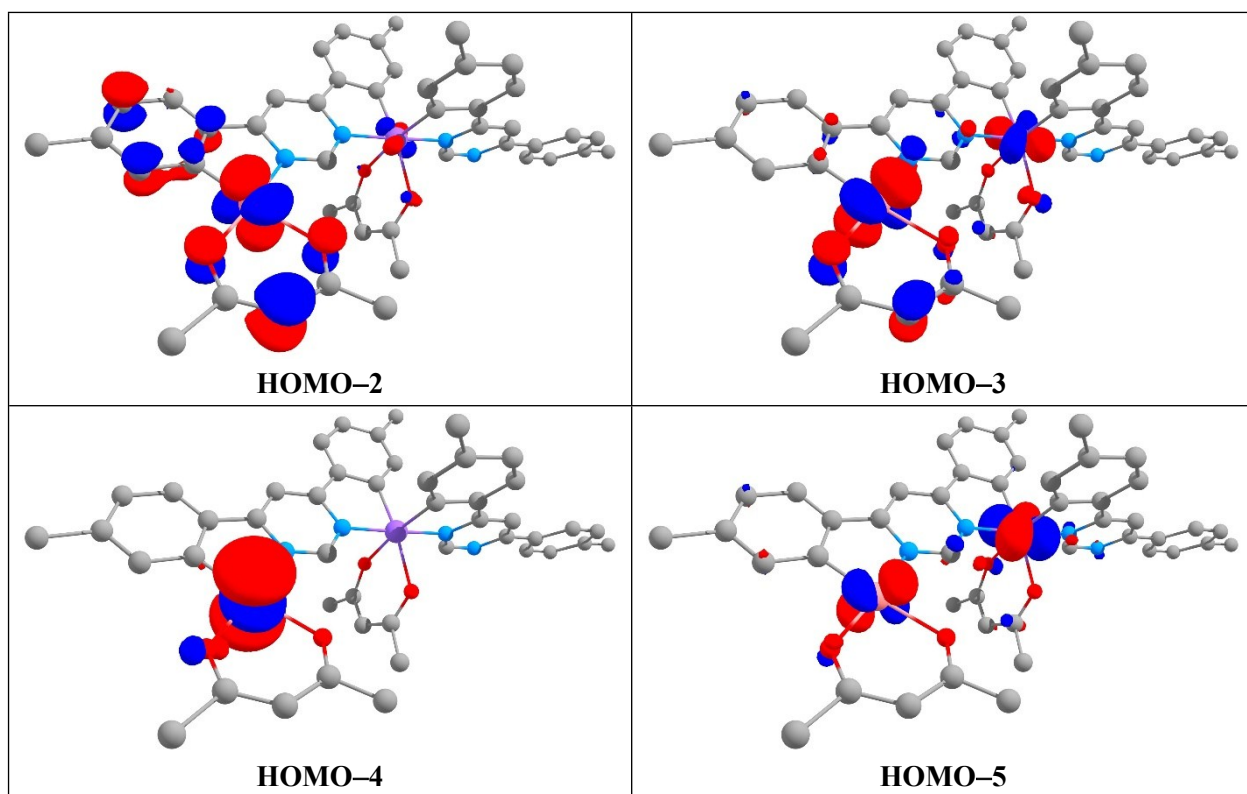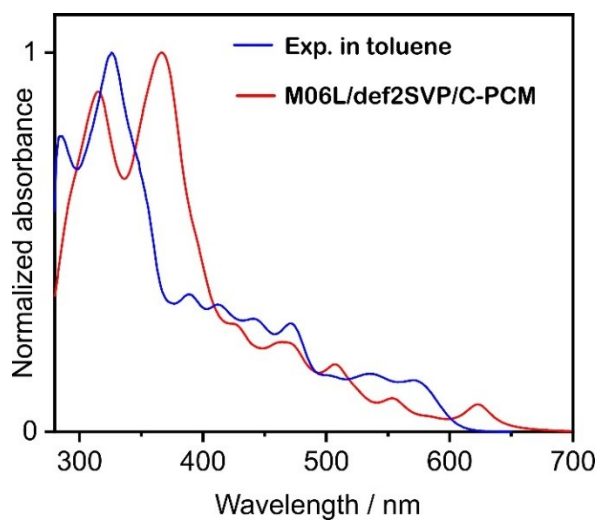

**Figure S1.** The measured absorption spectrum of compound **2** in toluene (blue), and the TD-DFT-calculated absorption spectrum of model compound **2'** in the optimized ground state geometry (red).

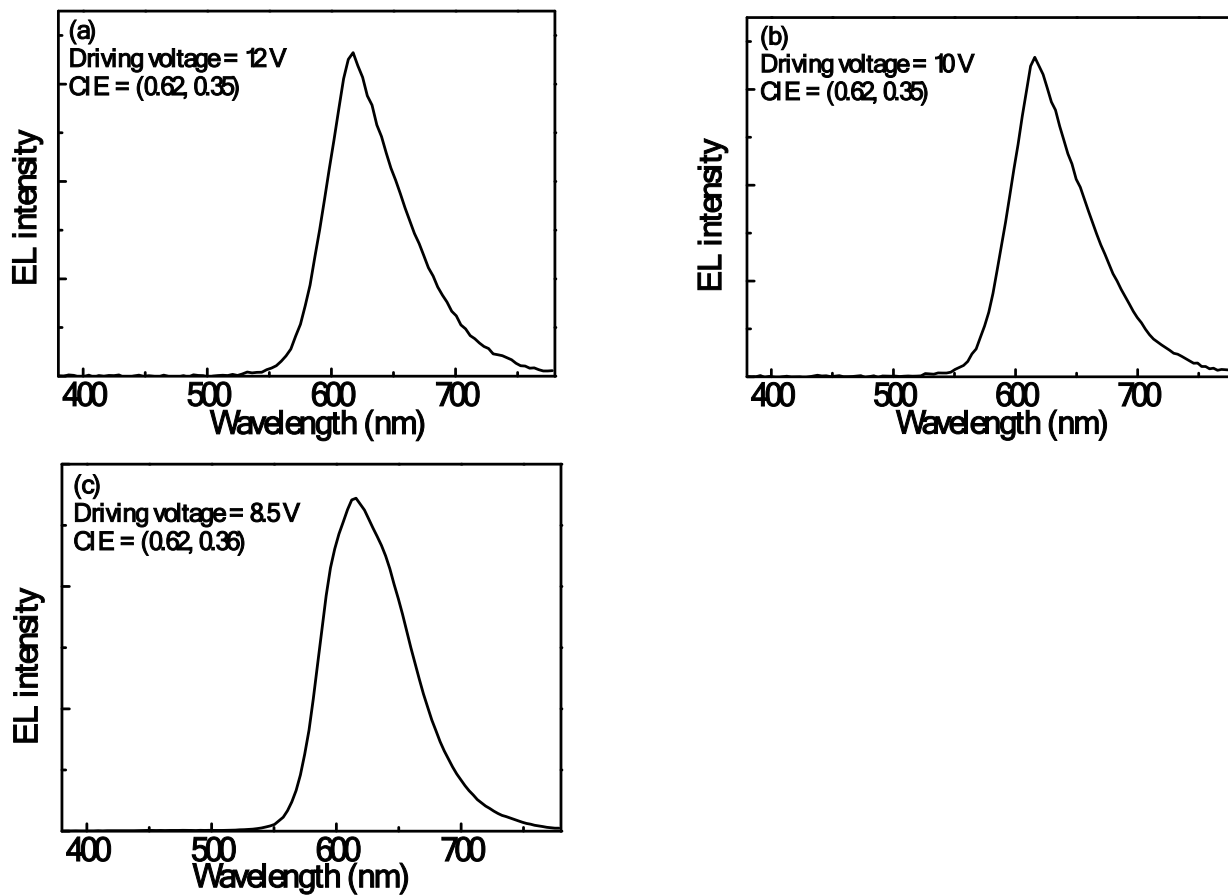

**Figure S2.** The EL spectrum as a function of drive voltage for the 1 mass% guest concentration LEC. The drive voltage and the corresponding CIE coordinates are identified in the insets.

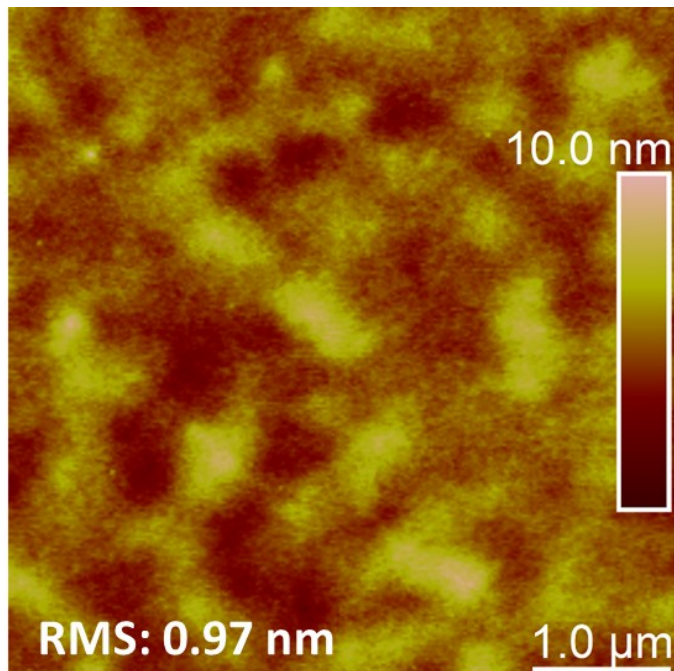

**Figure S3.** AFM image of the surface morphology of the LEC active material with 1 mass% guest concentration.
